# Supplementary material for: High-Throughput Prediction of MHC Class I and II Neoantigens with MHCnuggets
Source: Oxford University Press journal article supplement (doi:10.1158/2326-6066.cir-19-0464), 2019-12-23
Supplement: 23266066cir190464-sup-224371_2_supp_5920266_q2tjr3.xlsx [file 23266066cir190464-sup-224371_2_supp_5920266_q2tjr3.xlsx]

## Sheet: Table of Contents
Table of Contents
Table S1:	Dataset summaries	Data source used in training and benchmarking
Table S2:		TCGA data availability
Table S3a:	Bonsack et al. Supplements	Counts of predicted and true positives for each predictor on each allele in the Bonsack et al. benchmark dataset.
Table S3b:		Per-allele and per-predictor performance statistics of each method on the Bonsack et al. benchmark datset
Table S4a	Kim et al. Supplement	Counts of predicted and true positives for each predictor on each allele in the Kim benchmark dataset.
Table S4b		Per-allele and per-predictor performance statistics of each method on the Kim benchmark datset
Table S5a:	Combined Bassani-Sternberg et al. and Trolle et al (BST) Supplements	Counts of predicted and true positives for each predictor on each allele in the BST benchmark dataset.
Table S5b:		Per-allele and per-predictor performance statistics of each method on the BST benchmark datset
Table S5c:		Counts of predicted and true positives for each predictor on each allele in the BST benchmark dataset, broken down by peptide length.
Table S5d:		Per-allele and per-predictor performance statistics of each method on the BST benchmark datset, broken down by peptide length
Table S5e:		Per-allele and per-predictor performance statistics of each method on the BST benchmark datset for top 500 ranked peptides
Table S5f:		Per-allele and per-predictor performance statistics of each method on the BST benchmark datset for top 50 ranked peptides
Table S6a:	Jensen et al. Allele-Specific Supplements	Counts of predicted and true positives for each predictor on each allele in the Jensen et al. allele-specific benchmark dataset.
Table S6b:		Per-allele and per-predictor performance statistics of each method on the Jensen et al. allele-specific benchmark datset
Table S7:	IEDB LOMO Supplement	Per-allele and per-predictor performance on IEDB Class I rare alleles LOMO benchmark dataset
Table S8a:	Jensen et al. Pan LOMO Supplements	Counts of predicted and true positives for each predictor on each allele in the Jensen et al. Pan LOMO benchmark dataset.
Table S8b:		Per-allele and per-predictor performance statistics of each method on the Jensen et al. Pan LOMO benchmark datset
Table S9a:	TCGA analysis supplements	Tested MHC allele/IMM combinations per TCGA patient and number that pass immunogenic criteria
Table S9b:		TCGA samples with predicted IMMs and expressed missense mutations not predicted to be IMMs
Table S9c:		Predicted Immunogenic missense mutations (IMMs) shared in >1 TCGA patient
Table S9d:		Genes with regions enriched for predicted IMMs in TCGA
Table S9e:		TCGA patients with predicted IMM burden and leukocyte fraction estimate
Data S1	Bonsack et al	DataS1_Bonsack.csv		DataS1 - DataS6 available at Mendeley Data repository
Data S2	Kim et al	DataS2_Kim.csv
Data S3	Combined Bassani-Sternberg et al and Trolle et al and random human peptide decoys	DataS3_BST.csv		Shao, Xiaoshan; Karchin, Rachel (2019), “High-throughput prediction of MHC Class I and Class II neoantigens with MHCnuggets”, Mendeley Data, V1
Data S4	Jensen et al. AS	DataS4_Jensen_AS.csv		http://dx.doi.org/10.17632/8c26kkrfpr.2
Data S5	IEDB LOMO	DataS5_IEDB_LOMO.csv
Data S6	Jensen et al LOMO	DataS6_Jensen_LOMO.csv

## Sheet: Table S1
Table 1. Data sources used in training and benchmarking.
BA=binding affinity. HLAp=peptide elution/mass spectrometry. LOMO=leave one molecule out cross-validation. Only alleles with >30 characterized peptides were included. IEDB=curated version 2018. Common allele=>30 peptides with characterized binding information, rare allele= <30 characterized peptides, mono-allelic = engineered cells that express a single MHC allele, multi-allelic = cells that expr…
MHC Class	Common or rare alleles	Training Sets		Benchmarks
		Datasets	Description	Datasets	Description
Class I	Common	IEDB	BA, 241,553 peptides for 217 alleles	Bonsack et al	BA, Tested on 475 peptides for 7 alleles
		Abelin et al	HLAp, 23,651 peptides for 16 alleles, mono-allelic	Kim et al	BA, Trained on 53 alleles (BD2009), tested on 53 alleles (BLIND)
				BST	HLAp, 23,971 hits for 6 alleles .from Bassani-Sternberg 2015 and Trolle et al. plus random peptide decoys.
				Bassani-Sternberg et al 2015	HLAp, 22,598 hits for 26 alleles, multi-allelic
					Included in BST.
				Trolle et al	HLAp, 15,524 hits for 5 alleles, mono-allelic
					Included in BST.
				Random peptide decoys from human proteome	23,947,029 random decoy peptides generated from the human proteome (Included in BST).
Class II	Common	IEDB	BA, 96,211 peptides for 135 alleles	Jensen et al	BA, Five-fold cross-validation on 27 alleles.
Class I	Rare	NA	NA	IEDB Pseudo-Rare Alleles	BA, LOMO on 20 alleles, alleles with training samples between 30 and 100
Class II	Rare	NA	NA	Jensen et al	BA, LOMO on 27 alleles

## Sheet: Table S2
Table S2. TCGA data availability
Dataset	Data type	Source availability
MC3	somatic mutations	mc3.v0.2.8.CONTROLLED {10.1016/j.cels.2018.03.002}
TCGA gene expression	RNAseq	https://gdac.broadinstitute.org/,https://confluence.broadinstitute.org/pages/viewpage.action?pageId=67405049). last update June, 2016,
TCGA Immune Working Group	MHC haplotypes	{Thorsson, 2018 #91}

## Sheet: Table S3a
Table S3a Counts of predicted and true positives for each predictor on each allele in the Bonsack et al. benchmark dataset.
NOTE: MHC overall refers to weighted and ranked average of particular metric across all alleles
Predictor	mhc	#PP	#PP_in_top_n	#TP	#TP_in_top_n
MHCnuggets(no MS)	HLA-A0101	7	7	7	7
MHCnuggets(no MS)	HLA-A0201	97	28	28	16
MHCnuggets(no MS)	HLA-A0301	69	10	10	6
MHCnuggets(no MS)	HLA-A1101	105	24	24	15
MHCnuggets(no MS)	HLA-A2402	90	43	43	27
MHCnuggets(no MS)	HLA-B0702	31	19	19	15
MHCnuggets(no MS)	HLA-B1501	76	49	49	38
MHCnuggets	HLA-A0101	7	7	7	7
MHCnuggets	HLA-A0201	97	28	28	9
MHCnuggets	HLA-A0301	69	10	10	3
MHCnuggets	HLA-A1101	105	24	24	15
MHCnuggets	HLA-A2402	90	43	43	27
MHCnuggets	HLA-B0702	31	19	19	15
MHCnuggets	HLA-B1501	76	49	49	38
MHCflurry(no MS)	HLA-A0101	7	7	7	7
MHCflurry(no MS)	HLA-A0201	97	28	28	15
MHCflurry(no MS)	HLA-A0301	69	10	10	6
MHCflurry(no MS)	HLA-A1101	105	24	24	13
MHCflurry(no MS)	HLA-A2402	90	43	43	26
MHCflurry(no MS)	HLA-B0702	31	19	19	14
MHCflurry(no MS)	HLA-B1501	76	49	49	40
MHCflurry1.2.0	HLA-A0101	7	7	7	7
MHCflurry1.2.0	HLA-A0201	97	28	28	14
MHCflurry1.2.0	HLA-A0301	69	10	10	6
MHCflurry1.2.0	HLA-A1101	105	24	24	12
MHCflurry1.2.0	HLA-A2402	90	43	43	27
MHCflurry1.2.0	HLA-B0702	31	19	19	15
MHCflurry1.2.0	HLA-B1501	76	49	49	41
NetMHC4.0	HLA-A0101	7	7	7	7
NetMHC4.0	HLA-A0201	97	28	28	14
NetMHC4.0	HLA-A0301	69	10	10	7
NetMHC4.0	HLA-A1101	105	24	24	13
NetMHC4.0	HLA-A2402	90	43	43	27
NetMHC4.0	HLA-B0702	31	19	19	14
NetMHC4.0	HLA-B1501	76	49	49	39
NetMHCpan4.0	HLA-A0101	7	7	7	7
NetMHCpan4.0	HLA-A0201	97	28	28	15
NetMHCpan4.0	HLA-A0301	69	10	10	7
NetMHCpan4.0	HLA-A1101	105	24	24	12
NetMHCpan4.0	HLA-A2402	90	43	43	28
NetMHCpan4.0	HLA-B0702	31	19	19	15
NetMHCpan4.0	HLA-B1501	76	49	49	44

## Sheet: Table S3b
Table S3b. Per-allele and per-predictor performance statistics of each method on the Bonsack et al. benchmark datset
NOTE: Italic numbers are numbers reported in figures. MHC overall refers to weighted and ranked average of particular metric across all alleles
Predictor	mhc	PPVn	AUC	F1	KTAU	Pearson_R
MHCnuggets	overall	0.6333	0.7387	0.5496	0.3266	0.471
MHCnuggets(no MS)	overall	0.6333	0.7942	0.5496	0.3921	0.508
MHCflurry1.2.0	overall	0.6222	0.7853	0.5496	0.3836	0.519
MHCflurry(no MS)	overall	0.6167	0.7634	0.5496	0.3508	0.458
NetMHC4.0	overall	0.6167	0.7622	0.5496	0.3481	0.453
NetMHCpan4.0	overall	0.6278	0.7756	0.5496	0.369	0.492
MHCnuggets	HLA-A01:01	1	0	1	0.142857	0.307503
MHCnuggets	HLA-A02:01	0.321429	0.546584	0.448	0.0835663	0.238226
MHCnuggets	HLA-A03:01	0.3	0.542373	0.253165	0.0450621	0.361225
MHCnuggets	HLA-A11:01	0.625	0.815329	0.372093	0.372822	0.580091
MHCnuggets	HLA-A24:02	0.627907	0.754082	0.646617	0.385731	0.509084
MHCnuggets	HLA-B07:02	0.789474	0.833333	0.76	0.559505	0.788481
MHCnuggets	HLA-B15:01	0.77551	0.778534	0.784	0.394569	0.537405
MHCnuggets(no MS)	HLA-A01:01	1	0	1	0.142857	0.19069
MHCnuggets(no MS)	HLA-A02:01	0.571429	0.796066	0.448	0.375663	0.507603
MHCnuggets(no MS)	HLA-A03:01	0.6	0.861017	0.253165	0.353123	0.494308
MHCnuggets(no MS)	HLA-A11:01	0.625	0.815329	0.372093	0.372822	0.580091
MHCnuggets(no MS)	HLA-A24:02	0.627907	0.754082	0.646617	0.385731	0.509084
MHCnuggets(no MS)	HLA-B07:02	0.789474	0.833333	0.76	0.559505	0.788481
MHCnuggets(no MS)	HLA-B15:01	0.77551	0.778534	0.784	0.394569	0.537405
MHCflurry(no MS)	HLA-A01:01	1	0	1	0.142857	0.453694
MHCflurry(no MS)	HLA-A02:01	0.535714	0.763975	0.448	0.353099	0.43036
MHCflurry(no MS)	HLA-A03:01	0.6	0.913559	0.253165	0.412114	0.575514
MHCflurry(no MS)	HLA-A11:01	0.541667	0.786008	0.372093	0.333185	0.41733
MHCflurry(no MS)	HLA-A24:02	0.604651	0.716477	0.646617	0.36586	0.493422
MHCflurry(no MS)	HLA-B07:02	0.736842	0.802632	0.76	0.457355	0.65138
MHCflurry(no MS)	HLA-B15:01	0.816327	0.814059	0.784	0.426044	0.573276
MHCflurry1.2.0	HLA-A01:01	1	0	1	-0.047619	0.0946646
MHCflurry1.2.0	HLA-A02:01	0.5	0.736025	0.448	0.30919	0.382613
MHCflurry1.2.0	HLA-A03:01	0.6	0.894915	0.253165	0.385896	0.539792
MHCflurry1.2.0	HLA-A11:01	0.5	0.800412	0.372093	0.34927	0.517098
MHCflurry1.2.0	HLA-A24:02	0.627907	0.717961	0.646617	0.356508	0.527394
MHCflurry1.2.0	HLA-B07:02	0.789474	0.837719	0.76	0.540932	0.737468
MHCflurry1.2.0	HLA-B15:01	0.836735	0.845805	0.784	0.47026	0.623361
NetMHC4.0	HLA-A01:01	1	0	1	-0.142857	-0.110116
NetMHC4.0	HLA-A02:01	0.5	0.743789	0.448	0.325656	0.530755
NetMHC4.0	HLA-A03:01	0.7	0.898305	0.253165	0.399005	0.662112
NetMHC4.0	HLA-A11:01	0.541667	0.825103	0.372093	0.380865	0.485589
NetMHC4.0	HLA-A24:02	0.627907	0.680851	0.646617	0.284622	0.346312
NetMHC4.0	HLA-B07:02	0.736842	0.745614	0.76	0.420209	0.6554
NetMHC4.0	HLA-B15:01	0.795918	0.829932	0.784	0.452274	0.554168
NetMHCpan4.0	HLA-A01:01	1	0	1	0.047619	0.538041
NetMHCpan4.0	HLA-A02:01	0.535714	0.76087	0.448	0.351269	0.538192
NetMHCpan4.0	HLA-A03:01	0.7	0.883051	0.253165	0.389173	0.675583
NetMHCpan4.0	HLA-A11:01	0.5	0.828189	0.372093	0.383163	0.52801
NetMHCpan4.0	HLA-A24:02	0.651163	0.682335	0.646617	0.330793	0.412238
NetMHCpan4.0	HLA-B07:02	0.789474	0.79386	0.76	0.499144	0.712224
NetMHCpan4.0	HLA-B15:01	0.897959	0.944067	0.784	0.574429	0.665921

## Sheet: Table S4a
Table S4a. Counts of predicted and true positives for each predictor on each allele in the Kim benchmark dataset.
NOTE: MHC overall refers to weighted and ranked average of particular metric across all alleles
Predictor	mhc	#PP	#PP_in_top_n	#TP	#TP_in_top_n	#total_binders_tested	#total_peps_tested
MHCnuggets(noMS)	overall	8115	8115	6720	6720	9067	26654
MHCflurry(noMS)	overall	8445	8445	6961	6961	9067	26654
NetMHC3.0	overall	8830	8830	7226	7226	9067	26654
NetMHCpan2.0	overall	8416	8416	6992	6992	9067	26654
NetMHCpan2.0	HLA-A*26:01	120	120	80	80	130	1333
NetMHCpan2.0	HLA-A*26:02	94	94	81	81	99	413
NetMHCpan2.0	HLA-A*26:03	18	18	16	16	37	312
NetMHCpan2.0	HLA-B*45:01	5	5	4	4	5	65
NetMHCpan2.0	HLA-A*29:02	33	27	19	19	27	118
NetMHCpan2.0	H-2-Db	104	104	71	71	142	564
NetMHCpan2.0	HLA-B*40:02	15	15	15	15	18	74
NetMHCpan2.0	HLA-B*40:01	197	197	167	167	198	407
NetMHCpan2.0	HLA-B*08:02	10	10	8	8	18	509
NetMHCpan2.0	HLA-B*08:01	170	170	147	147	249	940
NetMHCpan2.0	HLA-B*58:01	166	166	155	155	219	445
NetMHCpan2.0	HLA-A*02:06	396	396	353	353	419	682
NetMHCpan2.0	HLA-B*44:02	106	106	102	102	230	411
NetMHCpan2.0	HLA-A*02:02	47	44	35	35	44	126
NetMHCpan2.0	HLA-A*02:03	404	404	392	392	426	651
NetMHCpan2.0	HLA-A*02:01	1181	1148	1025	1007	1148	2126
NetMHCpan2.0	HLA-A*32:01	143	131	105	97	131	449
NetMHCpan2.0	HLA-B*07:02	452	452	401	401	486	813
NetMHCpan2.0	HLA-B*18:01	14	14	8	8	28	503
NetMHCpan2.0	HLA-B*15:09	5	5	3	3	29	466
NetMHCpan2.0	HLA-B*39:01	18	18	16	16	25	641
NetMHCpan2.0	HLA-A*24:02	173	173	141	141	232	573
NetMHCpan2.0	HLA-B*35:01	303	223	187	156	223	542
NetMHCpan2.0	HLA-B*15:01	198	198	170	170	215	633
NetMHCpan2.0	HLA-B*15:03	52	33	25	22	33	165
NetMHCpan2.0	HLA-A*69:01	21	21	16	16	26	470
NetMHCpan2.0	Mamu-A*02:01	137	125	98	95	125	388
NetMHCpan2.0	HLA-A*01:01	76	76	52	52	99	696
NetMHCpan2.0	HLA-A*31:01	402	386	324	311	386	724
NetMHCpan2.0	HLA-B*44:03	167	167	142	142	199	378
NetMHCpan2.0	HLA-B*57:01	107	107	98	98	198	815
NetMHCpan2.0	HLA-B*27:05	16	16	9	9	29	314
NetMHCpan2.0	HLA-B*54:01	6	5	4	3	5	79
NetMHCpan2.0	HLA-A*03:01	454	454	416	416	486	811
NetMHCpan2.0	HLA-B*51:01	54	54	36	36	64	854
NetMHCpan2.0	HLA-B*53:01	208	206	156	154	206	485
NetMHCpan2.0	HLA-A*11:01	389	341	324	299	341	723
NetMHCpan2.0	HLA-A*25:01	4	4	4	4	5	416
NetMHCpan2.0	HLA-A*23:01	173	172	136	135	172	391
NetMHCpan2.0	HLA-A*68:01	361	349	328	321	349	527
NetMHCpan2.0	HLA-B*46:01	0	0	0	0	0	378
NetMHCpan2.0	HLA-B*15:17	121	93	76	71	93	582
NetMHCpan2.0	HLA-A*33:01	233	233	216	216	288	473
NetMHCpan2.0	HLA-A*80:01	16	7	5	5	7	379
NetMHCpan2.0	HLA-A*30:02	192	183	114	112	183	420
NetMHCpan2.0	HLA-A*30:01	203	183	144	138	183	660
NetMHCpan2.0	HLA-A*68:02	327	327	307	307	355	669
NetMHCpan2.0	H-2-Kb	200	200	169	169	308	558
NetMHCpan2.0	Mamu-A*01:01	49	49	41	41	67	274
NetMHCpan2.0	H-2-Kd	76	76	51	51	82	229
NetMHC3.0	HLA-A*26:01	125	125	69	69	130	1333
NetMHC3.0	HLA-A*26:02	94	94	74	74	99	413
NetMHC3.0	HLA-A*26:03	22	22	16	16	37	312
NetMHC3.0	HLA-B*45:01	5	5	5	5	5	65
NetMHC3.0	HLA-A*29:02	32	27	19	18	27	118
NetMHC3.0	H-2-Db	122	122	82	82	142	564
NetMHC3.0	HLA-B*40:02	11	11	11	11	18	74
NetMHC3.0	HLA-B*40:01	178	178	156	156	198	407
NetMHC3.0	HLA-B*08:02	3	3	2	2	18	509
NetMHC3.0	HLA-B*08:01	202	202	175	175	249	940
NetMHC3.0	HLA-B*58:01	175	175	163	163	219	445
NetMHC3.0	HLA-A*02:06	415	415	364	364	419	682
NetMHC3.0	HLA-B*44:02	97	97	93	93	230	411
NetMHC3.0	HLA-A*02:02	46	44	34	34	44	126
NetMHC3.0	HLA-A*02:03	411	411	397	397	426	651
NetMHC3.0	HLA-A*02:01	1197	1148	1036	1012	1148	2126
NetMHC3.0	HLA-A*32:01	164	131	114	92	131	449
NetMHC3.0	HLA-B*07:02	471	471	416	416	486	813
NetMHC3.0	HLA-B*18:01	11	11	7	7	28	503
NetMHC3.0	HLA-B*15:09	3	3	3	3	29	466
NetMHC3.0	HLA-B*39:01	23	23	18	18	25	641
NetMHC3.0	HLA-A*24:02	164	164	126	126	232	573
NetMHC3.0	HLA-B*35:01	277	223	178	151	223	542
NetMHC3.0	HLA-B*15:01	215	215	182	182	215	633
NetMHC3.0	HLA-B*15:03	48	33	24	20	33	165
NetMHC3.0	HLA-A*69:01	37	26	22	19	26	470
NetMHC3.0	Mamu-A*02:01	167	125	112	99	125	388
NetMHC3.0	HLA-A*01:01	85	85	57	57	99	696
NetMHC3.0	HLA-A*31:01	415	386	334	313	386	724
NetMHC3.0	HLA-B*44:03	169	169	141	141	199	378
NetMHC3.0	HLA-B*57:01	139	139	125	125	198	815
NetMHC3.0	HLA-B*27:05	13	13	6	6	29	314
NetMHC3.0	HLA-B*54:01	5	5	4	4	5	79
NetMHC3.0	HLA-A*03:01	480	480	435	435	486	811
NetMHC3.0	HLA-B*51:01	34	34	21	21	64	854
NetMHC3.0	HLA-B*53:01	211	206	153	148	206	485
NetMHC3.0	HLA-A*11:01	388	341	322	303	341	723
NetMHC3.0	HLA-A*25:01	7	5	4	4	5	416
NetMHC3.0	HLA-A*23:01	195	172	142	130	172	391
NetMHC3.0	HLA-A*68:01	369	349	332	323	349	527
NetMHC3.0	HLA-B*46:01	1	0	0	0	0	378
NetMHC3.0	HLA-B*15:17	139	93	74	63	93	582
NetMHC3.0	HLA-A*33:01	274	274	244	244	288	473
NetMHC3.0	HLA-A*80:01	16	7	5	4	7	379
NetMHC3.0	HLA-A*30:02	232	183	137	116	183	420
NetMHC3.0	HLA-A*30:01	205	183	142	135	183	660
NetMHC3.0	HLA-A*68:02	343	343	322	322	355	669
NetMHC3.0	H-2-Kb	277	277	238	238	308	558
NetMHC3.0	Mamu-A*01:01	51	51	41	41	67	274
NetMHC3.0	H-2-Kd	67	67	49	49	82	229
MHCnuggets(noMS)	HLA-A*26:01	101	101	63	63	130	1333
MHCnuggets(noMS)	HLA-A*26:02	133	99	82	74	99	413
MHCnuggets(noMS)	HLA-A*26:03	27	27	20	20	37	312
MHCnuggets(noMS)	HLA-B*45:01	3	3	3	3	5	65
MHCnuggets(noMS)	HLA-A*29:02	27	27	18	18	27	118
MHCnuggets(noMS)	H-2-Db	117	117	81	81	142	564
MHCnuggets(noMS)	HLA-B*40:02	14	14	13	13	18	74
MHCnuggets(noMS)	HLA-B*40:01	128	128	112	112	198	407
MHCnuggets(noMS)	HLA-B*08:02	4	4	3	3	18	509
MHCnuggets(noMS)	HLA-B*08:01	153	153	134	134	249	940
MHCnuggets(noMS)	HLA-B*58:01	164	164	152	152	219	445
MHCnuggets(noMS)	HLA-A*02:06	365	365	334	334	419	682
MHCnuggets(noMS)	HLA-B*44:02	114	114	104	104	230	411
MHCnuggets(noMS)	HLA-A*02:02	39	39	35	35	44	126
MHCnuggets(noMS)	HLA-A*02:03	405	405	395	395	426	651
MHCnuggets(noMS)	HLA-A*02:01	1147	1147	1013	1013	1148	2126
MHCnuggets(noMS)	HLA-A*32:01	161	131	110	94	131	449
MHCnuggets(noMS)	HLA-B*07:02	426	426	377	377	486	813
MHCnuggets(noMS)	HLA-B*18:01	9	9	5	5	28	503
MHCnuggets(noMS)	HLA-B*15:09	2	2	1	1	29	466
MHCnuggets(noMS)	HLA-B*39:01	23	23	15	15	25	641
MHCnuggets(noMS)	HLA-A*24:02	145	145	116	116	232	573
MHCnuggets(noMS)	HLA-B*35:01	210	210	147	147	223	542
MHCnuggets(noMS)	HLA-B*15:01	174	174	147	147	215	633
MHCnuggets(noMS)	HLA-B*15:03	59	33	30	19	33	165
MHCnuggets(noMS)	HLA-A*69:01	32	26	17	14	26	470
MHCnuggets(noMS)	Mamu-A*02:01	171	125	110	100	125	388
MHCnuggets(noMS)	HLA-A*01:01	103	99	59	57	99	696
MHCnuggets(noMS)	HLA-A*31:01	404	386	324	311	386	724
MHCnuggets(noMS)	HLA-B*44:03	143	143	125	125	199	378
MHCnuggets(noMS)	HLA-B*57:01	128	128	117	117	198	815
MHCnuggets(noMS)	HLA-B*27:05	18	18	10	10	29	314
MHCnuggets(noMS)	HLA-B*54:01	6	5	4	4	5	79
MHCnuggets(noMS)	HLA-A*03:01	430	430	396	396	486	811
MHCnuggets(noMS)	HLA-B*51:01	44	44	23	23	64	854
MHCnuggets(noMS)	HLA-B*53:01	200	200	147	147	206	485
MHCnuggets(noMS)	HLA-A*11:01	379	341	321	301	341	723
MHCnuggets(noMS)	HLA-A*25:01	5	5	4	4	5	416
MHCnuggets(noMS)	HLA-A*23:01	162	162	127	127	172	391
MHCnuggets(noMS)	HLA-A*68:01	364	349	332	327	349	527
MHCnuggets(noMS)	HLA-B*46:01	5	0	0	0	0	378
MHCnuggets(noMS)	HLA-B*15:17	133	93	81	71	93	582
MHCnuggets(noMS)	HLA-A*33:01	196	196	184	184	288	473
MHCnuggets(noMS)	HLA-A*80:01	9	7	3	2	7	379
MHCnuggets(noMS)	HLA-A*30:02	155	155	93	93	183	420
MHCnuggets(noMS)	HLA-A*30:01	201	183	142	136	183	660
MHCnuggets(noMS)	HLA-A*68:02	304	304	290	290	355	669
MHCnuggets(noMS)	H-2-Kb	254	254	219	219	308	558
MHCnuggets(noMS)	Mamu-A*01:01	61	61	45	45	67	274
MHCnuggets(noMS)	H-2-Kd	58	58	37	37	82	229
MHCflurry(noMS)	HLA-A*26:01	140	130	78	74	130	1333
MHCflurry(noMS)	HLA-A*26:02	58	58	55	55	99	413
MHCflurry(noMS)	HLA-A*26:03	19	19	18	18	37	312
MHCflurry(noMS)	HLA-B*45:01	4	4	4	4	5	65
MHCflurry(noMS)	HLA-A*29:02	32	27	19	18	27	118
MHCflurry(noMS)	H-2-Db	125	125	90	90	142	564
MHCflurry(noMS)	HLA-B*40:02	14	14	12	12	18	74
MHCflurry(noMS)	HLA-B*40:01	163	163	138	138	198	407
MHCflurry(noMS)	HLA-B*08:02	22	18	14	12	18	509
MHCflurry(noMS)	HLA-B*08:01	177	177	150	150	249	940
MHCflurry(noMS)	HLA-B*58:01	163	163	152	152	219	445
MHCflurry(noMS)	HLA-A*02:06	394	394	349	349	419	682
MHCflurry(noMS)	HLA-B*44:02	134	134	125	125	230	411
MHCflurry(noMS)	HLA-A*02:02	43	43	33	33	44	126
MHCflurry(noMS)	HLA-A*02:03	415	415	400	400	426	651
MHCflurry(noMS)	HLA-A*02:01	1181	1148	1033	1014	1148	2126
MHCflurry(noMS)	HLA-A*32:01	145	131	86	78	131	449
MHCflurry(noMS)	HLA-B*07:02	441	441	397	397	486	813
MHCflurry(noMS)	HLA-B*18:01	21	21	9	9	28	503
MHCflurry(noMS)	HLA-B*15:09	28	28	14	14	29	466
MHCflurry(noMS)	HLA-B*39:01	26	25	15	15	25	641
MHCflurry(noMS)	HLA-A*24:02	170	170	132	132	232	573
MHCflurry(noMS)	HLA-B*35:01	226	223	165	164	223	542
MHCflurry(noMS)	HLA-B*15:01	190	190	162	162	215	633
MHCflurry(noMS)	HLA-B*15:03	29	29	19	19	33	165
MHCflurry(noMS)	HLA-A*69:01	39	26	21	16	26	470
MHCflurry(noMS)	Mamu-A*02:01	148	125	103	95	125	388
MHCflurry(noMS)	HLA-A*01:01	91	91	55	55	99	696
MHCflurry(noMS)	HLA-A*31:01	410	386	327	311	386	724
MHCflurry(noMS)	HLA-B*44:03	161	161	142	142	199	378
MHCflurry(noMS)	HLA-B*57:01	109	109	98	98	198	815
MHCflurry(noMS)	HLA-B*27:05	21	21	11	11	29	314
MHCflurry(noMS)	HLA-B*54:01	6	5	4	4	5	79
MHCflurry(noMS)	HLA-A*03:01	459	459	418	418	486	811
MHCflurry(noMS)	HLA-B*51:01	39	39	23	23	64	854
MHCflurry(noMS)	HLA-B*53:01	165	165	113	113	206	485
MHCflurry(noMS)	HLA-A*11:01	389	341	324	296	341	723
MHCflurry(noMS)	HLA-A*25:01	7	5	4	4	5	416
MHCflurry(noMS)	HLA-A*23:01	182	172	131	124	172	391
MHCflurry(noMS)	HLA-A*68:01	366	349	333	325	349	527
MHCflurry(noMS)	HLA-B*46:01	1	0	0	0	0	378
MHCflurry(noMS)	HLA-B*15:17	76	76	54	54	93	582
MHCflurry(noMS)	HLA-A*33:01	225	225	205	205	288	473
MHCflurry(noMS)	HLA-A*80:01	27	7	1	0	7	379
MHCflurry(noMS)	HLA-A*30:02	229	183	133	109	183	420
MHCflurry(noMS)	HLA-A*30:01	202	183	144	139	183	660
MHCflurry(noMS)	HLA-A*68:02	332	332	312	312	355	669
MHCflurry(noMS)	H-2-Kb	294	294	255	255	308	558
MHCflurry(noMS)	Mamu-A*01:01	50	50	38	38	67	274
MHCflurry(noMS)	H-2-Kd	57	57	43	43	82	229

## Sheet: Table S4b
Table S4b. Per-allele and per-predictor performance statistics of each method on the Kim benchmark datset
NOTE: Italic numbers are numbers reported in figures. MHCs of overall refers to weighted and ranked average of particular metric across all alleles
Predictor	mhc	PPVn	AUC	F1	KTAU	Pearson r
MHCnuggets(no MS)	Overall	0.8285	0.9242	0.7826	0.5782	0.8026
MHCflurry(no MS)	Overall	0.8243	0.9256	0.7952	0.5738	0.8085
NetMHC3.0	Overall	0.8183	0.9308	0.8077	0.5887	0.8208
NetMHCpan2.0	Overall	0.8307	0.931	0.8	0.585	0.8218
NetMHCpan2.0	H-2-DB	0.6827	0.8746	0.5772	0.5759	0.7682
NetMHCpan2.0	H-2-KB	0.845	0.8256	0.6654	0.4866	0.6772
NetMHCpan2.0	H-2-KD	0.6711	0.8192	0.6456	0.3873	0.5829
NetMHCpan2.0	HLA-A01:01	0.6842	0.8949	0.5943	0.5018	0.7195
NetMHCpan2.0	HLA-A02:01	0.8778	0.9305	0.881	0.6383	0.8454
NetMHCpan2.0	HLA-A02:02	0.7955	0.8987	0.7692	0.6273	0.845
NetMHCpan2.0	HLA-A02:03	0.9703	0.9742	0.9446	0.5919	0.8722
NetMHCpan2.0	HLA-A02:06	0.8914	0.9108	0.8663	0.5362	0.759
NetMHCpan2.0	HLA-A03:01	0.9163	0.9273	0.8851	0.6104	0.8417
NetMHCpan2.0	HLA-A11:01	0.8768	0.9451	0.8877	0.6276	0.8638
NetMHCpan2.0	HLA-A23:01	0.7849	0.8952	0.7884	0.6408	0.8491
NetMHCpan2.0	HLA-A24:02	0.8092	0.8929	0.6931	0.6048	0.7874
NetMHCpan2.0	HLA-A25:01	1	0.9985	0.8889	0.154	0.693
NetMHCpan2.0	HLA-A26:01	0.6667	0.9423	0.64	0.4514	0.7934
NetMHCpan2.0	HLA-A26:02	0.8617	0.9578	0.8394	0.5611	0.8635
NetMHCpan2.0	HLA-A26:03	0.8889	0.9343	0.5818	0.4264	0.7471
NetMHCpan2.0	HLA-A29:02	0.7037	0.8824	0.6333	0.6461	0.8409
NetMHCpan2.0	HLA-A30:01	0.7541	0.872	0.7461	0.4608	0.725
NetMHCpan2.0	HLA-A30:02	0.6133	0.7327	0.6113	0.3192	0.4609
NetMHCpan2.0	HLA-A31:01	0.8057	0.8593	0.8223	0.53	0.6968
NetMHCpan2.0	HLA-A32:01	0.7405	0.9072	0.7664	0.488	0.7527
NetMHCpan2.0	HLA-A33:01	0.927	0.9312	0.8292	0.6166	0.8336
NetMHCpan2.0	HLA-A68:01	0.9198	0.9489	0.9239	0.6013	0.8562
NetMHCpan2.0	HLA-A68:02	0.9388	0.9642	0.9003	0.6553	0.8781
NetMHCpan2.0	HLA-A69:01	0.7619	0.9443	0.6809	0.3274	0.6721
NetMHCpan2.0	HLA-A80:01	0.7143	0.9808	0.4348	0.1865	0.5559
NetMHCpan2.0	HLA-B07:02	0.8872	0.9135	0.855	0.6062	0.8034
NetMHCpan2.0	HLA-B08:01	0.8647	0.9428	0.7017	0.6077	0.8365
NetMHCpan2.0	HLA-B08:02	0.8	0.9896	0.5714	0.4106	0.8209
NetMHCpan2.0	HLA-B15:01	0.8586	0.9356	0.8232	0.5898	0.8017
NetMHCpan2.0	HLA-B15:03	0.6667	0.8701	0.5882	0.5395	0.7358
NetMHCpan2.0	HLA-B15:09	0.6	0.9229	0.1765	0.4481	0.6503
NetMHCpan2.0	HLA-B15:17	0.7634	0.9345	0.7103	0.4486	0.7644
NetMHCpan2.0	HLA-B18:01	0.5714	0.7895	0.381	0.2342	0.5093
NetMHCpan2.0	HLA-B27:05	0.5625	0.9439	0.4	0.4141	0.6594
NetMHCpan2.0	HLA-B35:01	0.6996	0.8363	0.711	0.5169	0.7001
NetMHCpan2.0	HLA-B39:01	0.8889	0.9801	0.7442	0.3167	0.7627
NetMHCpan2.0	HLA-B40:01	0.8477	0.9207	0.8456	0.6214	0.8285
NetMHCpan2.0	HLA-B40:02	1	0.9187	0.9091	0.5111	0.8259
NetMHCpan2.0	HLA-B44:02	0.9623	0.9346	0.6071	0.5998	0.8029
NetMHCpan2.0	HLA-B44:03	0.8503	0.891	0.776	0.5899	0.8015
NetMHCpan2.0	HLA-B45:01	0.8	0.9933	0.8	0.1972	0.7991
NetMHCpan2.0	HLA-B51:01	0.6667	0.9487	0.6102	0.4097	0.7642
NetMHCpan2.0	HLA-B53:01	0.7476	0.8857	0.7536	0.5629	0.7636
NetMHCpan2.0	HLA-B54:01	0.6	0.8459	0.7273	0.4455	0.7549
NetMHCpan2.0	HLA-B57:01	0.9159	0.8831	0.6426	0.4603	0.7966
NetMHCpan2.0	HLA-B58:01	0.9337	0.882	0.8052	0.5324	0.7927
NetMHCpan2.0	Mamu-A:01	0.8367	0.9128	0.7069	0.5459	0.7837
NetMHCpan2.0	Mamu-A:02	0.76	0.8831	0.7481	0.528	0.7709
MHCnuggets(no MS)	H-2-Db	0.6923	0.8957	0.6255	0.6156	0.787
MHCnuggets(no MS)	H-2-Kb	0.8622	0.8899	0.7794	0.5768	0.7783
MHCnuggets(no MS)	H-2-Kd	0.6379	0.7261	0.5286	0.3161	0.4854
MHCnuggets(no MS)	HLA-A01:01	0.5758	0.8899	0.5842	0.4884	0.7074
MHCnuggets(no MS)	HLA-A02:01	0.8831	0.9281	0.8836	0.6239	0.8387
MHCnuggets(no MS)	HLA-A02:02	0.8974	0.9174	0.8434	0.6353	0.8672
MHCnuggets(no MS)	HLA-A02:03	0.9753	0.9734	0.9507	0.5857	0.8733
MHCnuggets(no MS)	HLA-A02:06	0.9151	0.9053	0.852	0.537	0.7546
MHCnuggets(no MS)	HLA-A03:01	0.9209	0.9282	0.8646	0.6051	0.8321
MHCnuggets(no MS)	HLA-A11:01	0.8827	0.9443	0.8917	0.6204	0.8654
MHCnuggets(no MS)	HLA-A23:01	0.784	0.8855	0.7605	0.6294	0.8173
MHCnuggets(no MS)	HLA-A24:02	0.7931	0.8705	0.6117	0.5693	0.7218
MHCnuggets(no MS)	HLA-A25:01	0.8	0.9951	0.8	0.1529	0.7705
MHCnuggets(no MS)	HLA-A26:01	0.6238	0.9258	0.5455	0.4349	0.7525
MHCnuggets(no MS)	HLA-A26:02	0.7475	0.911	0.7069	0.4762	0.709
MHCnuggets(no MS)	HLA-A26:03	0.7407	0.9041	0.625	0.3715	0.7084
MHCnuggets(no MS)	HLA-A29:02	0.6667	0.886	0.6667	0.6453	0.8585
MHCnuggets(no MS)	HLA-A30:01	0.7432	0.8852	0.7396	0.5142	0.7466
MHCnuggets(no MS)	HLA-A30:02	0.6	0.7287	0.5536	0.3176	0.4457
MHCnuggets(no MS)	HLA-A31:01	0.8057	0.8564	0.8203	0.5147	0.6819
MHCnuggets(no MS)	HLA-A32:01	0.7176	0.8977	0.7534	0.5098	0.7388
MHCnuggets(no MS)	HLA-A33:01	0.9388	0.9178	0.7603	0.5883	0.8086
MHCnuggets(no MS)	HLA-A68:01	0.937	0.9553	0.9313	0.6002	0.8658
MHCnuggets(no MS)	HLA-A68:02	0.9539	0.9655	0.8801	0.6526	0.8748
MHCnuggets(no MS)	HLA-A69:01	0.5385	0.931	0.5862	0.3095	0.6437
MHCnuggets(no MS)	HLA-A80:01	0.2857	0.9535	0.375	0.1736	0.5633
MHCnuggets(no MS)	HLA-B07:02	0.885	0.9048	0.8268	0.5833	0.7752
MHCnuggets(no MS)	HLA-B08:01	0.8758	0.9258	0.6667	0.5889	0.771
MHCnuggets(no MS)	HLA-B08:02	0.75	0.9632	0.2727	0.3484	0.6844
MHCnuggets(no MS)	HLA-B15:01	0.8448	0.9217	0.7558	0.561	0.7705
MHCnuggets(no MS)	HLA-B15:03	0.5758	0.8806	0.6522	0.4482	0.6557
MHCnuggets(no MS)	HLA-B15:09	0.5	0.7475	0.0645	0.302	0.2849
MHCnuggets(no MS)	HLA-B15:17	0.7634	0.9211	0.7168	0.4096	0.7343
MHCnuggets(no MS)	HLA-B18:01	0.5556	0.7992	0.2703	0.2351	0.3863
MHCnuggets(no MS)	HLA-B27:05	0.5556	0.9468	0.4255	0.4601	0.64
MHCnuggets(no MS)	HLA-B35:01	0.7	0.8218	0.679	0.5036	0.6754
MHCnuggets(no MS)	HLA-B39:01	0.6522	0.9718	0.625	0.3148	0.7289
MHCnuggets(no MS)	HLA-B40:01	0.875	0.9105	0.6871	0.5872	0.7635
MHCnuggets(no MS)	HLA-B40:02	0.9286	0.9494	0.8125	0.5011	0.8093
MHCnuggets(no MS)	HLA-B44:02	0.9123	0.9093	0.6047	0.5606	0.7278
MHCnuggets(no MS)	HLA-B44:03	0.8741	0.8907	0.731	0.5668	0.7638
MHCnuggets(no MS)	HLA-B45:01	1	0.99	0.75	0.3499	0.8749
MHCnuggets(no MS)	HLA-B51:01	0.5227	0.9231	0.4259	0.3885	0.71
MHCnuggets(no MS)	HLA-B53:01	0.735	0.855	0.7241	0.5328	0.7238
MHCnuggets(no MS)	HLA-B54:01	0.8	0.8189	0.7273	0.3914	0.7754
MHCnuggets(no MS)	HLA-B57:01	0.9141	0.9064	0.7178	0.5255	0.8242
MHCnuggets(no MS)	HLA-B58:01	0.9268	0.8997	0.7937	0.5663	0.801
MHCnuggets(no MS)	Mamu-A01:01	0.7377	0.8911	0.7031	0.5165	0.7408
MHCnuggets(no MS)	Mamu-A02:01	0.8	0.9233	0.7432	0.5722	0.7775
MHCflurry(no MS)	H-2-DB	0.72	0.9052	0.6742	0.621	0.8148
MHCflurry(no MS)	H-2-KB	0.8673	0.9159	0.8472	0.6033	0.8035
MHCflurry(no MS)	H-2-KD	0.7544	0.7971	0.6187	0.3623	0.5537
MHCflurry(no MS)	HLA-A01:01	0.6044	0.9001	0.5789	0.4898	0.7086
MHCflurry(no MS)	HLA-A02:01	0.8839	0.9332	0.8878	0.6382	0.8475
MHCflurry(no MS)	HLA-A02:02	0.7674	0.8839	0.7586	0.6006	0.8363
MHCflurry(no MS)	HLA-A02:03	0.9639	0.9734	0.9512	0.5919	0.8714
MHCflurry(no MS)	HLA-A02:06	0.8858	0.9083	0.8585	0.5374	0.757
MHCflurry(no MS)	HLA-A03:01	0.9107	0.93	0.8847	0.6185	0.8433
MHCflurry(no MS)	HLA-A11:01	0.868	0.9498	0.8877	0.6314	0.861
MHCflurry(no MS)	HLA-A23:01	0.7209	0.8579	0.7401	0.596	0.8103
MHCflurry(no MS)	HLA-A24:02	0.7706	0.8587	0.6534	0.5668	0.7474
MHCflurry(no MS)	HLA-A25:01	0.8	0.98	0.6667	0.1479	0.573
MHCflurry(no MS)	HLA-A26:01	0.5692	0.9286	0.5778	0.4412	0.7351
MHCflurry(no MS)	HLA-A26:02	0.9483	0.9605	0.7006	0.5691	0.8581
MHCflurry(no MS)	HLA-A26:03	0.9474	0.8502	0.6429	0.3321	0.687
MHCflurry(no MS)	HLA-A29:02	0.6667	0.8816	0.6441	0.6434	0.837
MHCflurry(no MS)	HLA-A30:01	0.7596	0.8615	0.7481	0.4381	0.7136
MHCflurry(no MS)	HLA-A30:02	0.5967	0.7467	0.6488	0.3441	0.4973
MHCflurry(no MS)	HLA-A31:01	0.8057	0.858	0.8216	0.5203	0.6902
MHCflurry(no MS)	HLA-A32:01	0.5954	0.8181	0.6232	0.3772	0.5628
MHCflurry(no MS)	HLA-A33:01	0.9111	0.9183	0.7992	0.5921	0.8178
MHCflurry(no MS)	HLA-A68:01	0.9312	0.953	0.9315	0.588	0.8503
MHCflurry(no MS)	HLA-A68:02	0.9398	0.9658	0.9083	0.6518	0.8782
MHCflurry(no MS)	HLA-A69:01	0.6154	0.9527	0.6462	0.3255	0.638
MHCflurry(no MS)	HLA-A80:01	0	0.8879	0.0588	0.1453	0.2312
MHCflurry(no MS)	HLA-B07:02	0.9002	0.913	0.8565	0.6001	0.7995
MHCflurry(no MS)	HLA-B08:01	0.8475	0.933	0.7042	0.5766	0.8143
MHCflurry(no MS)	HLA-B08:02	0.6667	0.9864	0.7	0.3833	0.7534
MHCflurry(no MS)	HLA-B15:01	0.8526	0.9224	0.8	0.5764	0.7909
MHCflurry(no MS)	HLA-B15:03	0.6552	0.84	0.6129	0.4959	0.7148
MHCflurry(no MS)	HLA-B15:09	0.5	0.9039	0.4912	0.4091	0.6069
MHCflurry(no MS)	HLA-B15:17	0.7105	0.9079	0.6391	0.415	0.7115
MHCflurry(no MS)	HLA-B18:01	0.4286	0.8118	0.3673	0.2219	0.4359
MHCflurry(no MS)	HLA-B27:05	0.5238	0.9509	0.44	0.419	0.6594
MHCflurry(no MS)	HLA-B35:01	0.7354	0.8397	0.735	0.5217	0.7071
MHCflurry(no MS)	HLA-B39:01	0.6	0.9778	0.5882	0.3014	0.6393
MHCflurry(no MS)	HLA-B40:01	0.8466	0.9089	0.7645	0.5761	0.7839
MHCflurry(no MS)	HLA-B40:02	0.8571	0.9216	0.75	0.5246	0.762
MHCflurry(no MS)	HLA-B44:02	0.9328	0.9158	0.6868	0.5775	0.7803
MHCflurry(no MS)	HLA-B44:03	0.882	0.8798	0.7889	0.5326	0.7508
MHCflurry(no MS)	HLA-B45:01	1	0.99	0.8889	0.3545	0.7842
MHCflurry(no MS)	HLA-B51:01	0.5897	0.9283	0.4466	0.3809	0.6931
MHCflurry(no MS)	HLA-B53:01	0.6848	0.7676	0.6092	0.4095	0.5738
MHCflurry(no MS)	HLA-B54:01	0.8	0.8676	0.7273	0.3507	0.5863
MHCflurry(no MS)	HLA-B57:01	0.8991	0.8648	0.6384	0.4146	0.7606
MHCflurry(no MS)	HLA-B58:01	0.9325	0.8734	0.7958	0.5188	0.7835
MHCflurry(no MS)	Mamu-A:01	0.76	0.9076	0.6496	0.5499	0.7747
MHCflurry(no MS)	Mamu-A:02	0.76	0.9267	0.7546	0.6082	0.8143
NetMHC3.0	H-2-DB	0.6721	0.8962	0.6212	0.6021	0.802
NetMHC3.0	H-2-KB	0.8592	0.8917	0.8137	0.5731	0.7768
NetMHC3.0	H-2-KD	0.7313	0.8153	0.6577	0.3985	0.5828
NetMHC3.0	HLA-A01:01	0.6706	0.9153	0.6196	0.527	0.7558
NetMHC3.0	HLA-A02:01	0.8822	0.9322	0.8843	0.6362	0.8464
NetMHC3.0	HLA-A02:02	0.7727	0.8904	0.7556	0.6293	0.8474
NetMHC3.0	HLA-A02:03	0.9659	0.9759	0.9486	0.5872	0.8808
NetMHC3.0	HLA-A02:06	0.8771	0.9136	0.8729	0.544	0.7656
NetMHC3.0	HLA-A03:01	0.9062	0.9352	0.9006	0.627	0.8549
NetMHC3.0	HLA-A11:01	0.8886	0.9493	0.8834	0.633	0.8653
NetMHC3.0	HLA-A23:01	0.7558	0.8815	0.7738	0.6143	0.8372
NetMHC3.0	HLA-A24:02	0.7622	0.8642	0.6329	0.5803	0.7765
NetMHC3.0	HLA-A25:01	0.8	0.9917	0.6667	0.1518	0.5493
NetMHC3.0	HLA-A26:01	0.552	0.9308	0.5412	0.4363	0.7564
NetMHC3.0	HLA-A26:02	0.7872	0.9316	0.7668	0.5254	0.8065
NetMHC3.0	HLA-A26:03	0.7273	0.8902	0.5424	0.3663	0.6448
NetMHC3.0	HLA-A29:02	0.6667	0.8689	0.6441	0.6292	0.8277
NetMHC3.0	HLA-A30:01	0.7377	0.8669	0.732	0.4575	0.7154
NetMHC3.0	HLA-A30:02	0.6298	0.7497	0.6634	0.3387	0.4932
NetMHC3.0	HLA-A31:01	0.8109	0.8626	0.834	0.5254	0.6925
NetMHC3.0	HLA-A32:01	0.7023	0.8931	0.7729	0.4596	0.7143
NetMHC3.0	HLA-A33:01	0.8905	0.9146	0.8683	0.5885	0.8229
NetMHC3.0	HLA-A68:01	0.9255	0.948	0.9248	0.5717	0.8442
NetMHC3.0	HLA-A68:02	0.9388	0.972	0.9226	0.6537	0.8849
NetMHC3.0	HLA-A69:01	0.7308	0.9601	0.6984	0.3353	0.7007
NetMHC3.0	HLA-A80:01	0.5714	0.9835	0.4348	0.1824	0.5309
NetMHC3.0	HLA-B07:02	0.8832	0.9161	0.8694	0.6075	0.8107
NetMHC3.0	HLA-B08:01	0.8663	0.9462	0.7761	0.6304	0.8496
NetMHC3.0	HLA-B08:02	0.6667	0.9899	0.1905	0.3938	0.7782
NetMHC3.0	HLA-B15:01	0.8465	0.9344	0.8465	0.5924	0.8103
NetMHC3.0	HLA-B15:03	0.6061	0.8648	0.5926	0.4849	0.6698
NetMHC3.0	HLA-B15:09	1	0.9012	0.1875	0.3543	0.5784
NetMHC3.0	HLA-B15:17	0.6774	0.9027	0.6379	0.4225	0.7004
NetMHC3.0	HLA-B18:01	0.6364	0.7945	0.359	0.2372	0.5025
NetMHC3.0	HLA-B27:05	0.4615	0.9485	0.2857	0.4514	0.6486
NetMHC3.0	HLA-B35:01	0.6771	0.8287	0.712	0.5184	0.7052
NetMHC3.0	HLA-B39:01	0.7826	0.9652	0.75	0.3051	0.7745
NetMHC3.0	HLA-B40:01	0.8764	0.9287	0.8298	0.6366	0.8335
NetMHC3.0	HLA-B40:02	1	0.9206	0.7586	0.4486	0.7964
NetMHC3.0	HLA-B44:02	0.9588	0.9123	0.5688	0.5756	0.8036
NetMHC3.0	HLA-B44:03	0.8343	0.8695	0.7663	0.5424	0.7835
NetMHC3.0	HLA-B45:01	1	1	1	0.1949	0.8594
NetMHC3.0	HLA-B51:01	0.6176	0.9192	0.4286	0.3667	0.6719
NetMHC3.0	HLA-B53:01	0.7184	0.8414	0.7338	0.5171	0.7174
NetMHC3.0	HLA-B54:01	0.8	0.8162	0.8	0.4174	0.8334
NetMHC3.0	HLA-B57:01	0.8993	0.8991	0.7418	0.4852	0.798
NetMHC3.0	HLA-B58:01	0.9314	0.8917	0.8274	0.5461	0.8039
NetMHC3.0	Mamu-A:01	0.8039	0.9167	0.6949	0.571	0.783
NetMHC3.0	Mamu-A:02	0.792	0.9297	0.7671	0.6069	0.8097

## Sheet: Table S5a
Table S5a. Counts of predicted and true positives for each predictor on each allele in BST benchmark dataset.
NOTE: MHC overall refers to weighted and ranked average of particular metric across all alleles
Predictor	mhc	#PP	#PP_in_top_n	#TP	#TP_in_top_n	#total_binders_tested	#total_peps_tested
MHCnuggets	A*31:01	81	81	14	14	2035	2035000
MHCnuggets	B*51:01	7	7	7	7	1493	1493000
MHCnuggets	A*24:02	1509	1509	527	527	4496	4496000
MHCnuggets	A*01:01	2929	2929	1345	1345	3958	3958000
MHCnuggets	A*03:01	128	128	52	52	5862	5862000
MHCnuggets	A*02:01	22	22	8	8	6127	6127000
NetMHCpan4.0	A*31:01	57352	2035	951	150	2035	2035000
NetMHCpan4.0	B*51:01	1973	1493	408	331	1493	1493000
NetMHCpan4.0	A*24:02	31590	4496	2538	830	4496	4496000
NetMHCpan4.0	A*01:01	12271	3958	2255	1514	3958	3958000
NetMHCpan4.0	A*03:01	88041	5862	3693	663	5862	5862000
NetMHCpan4.0	A*02:01	164766	6127	3869	606	6127	6127000
MHCflurry1.2.0	A*31:01	69762	2035	974	107	2035	2035000
MHCflurry1.2.0	B*51:01	993	993	250	250	1493	1493000
MHCflurry1.2.0	A*24:02	55339	4496	2899	724	4496	4496000
MHCflurry1.2.0	A*01:01	16831	3958	2433	1629	3958	3958000
MHCflurry1.2.0	A*03:01	102348	5862	3936	750	5862	5862000
MHCflurry1.2.0	A*02:01	134737	6127	3735	457	6127	6127000
NetMHC4.0	A*31:01	59203	2035	901	135	2035	2035000
NetMHC4.0	B*51:01	1931	1493	332	287	1493	1493000
NetMHC4.0	A*24:02	33766	4496	2241	694	4496	4496000
NetMHC4.0	A*01:01	18802	3958	2251	1223	3958	3958000
NetMHC4.0	A*03:01	93901	5862	3422	520	5862	5862000
NetMHC4.0	A*02:01	168970	6127	3477	466	6127	6127000
MHCflurryMS	A*31:01	56911	2035	892	149	2035	2035000
MHCflurryMS	B*51:01	2138	1493	369	285	1493	1493000
MHCflurryMS	A*24:02	31743	4496	2418	711	4496	4496000
MHCflurryMS	A*01:01	17614	3958	2433	1587	3958	3958000
MHCflurryMS	A*03:01	94463	5862	3715	727	5862	5862000
MHCflurryMS	A*02:01	150267	6127	3826	468	6127	6127000
MHCnuggets	overall	4676	4676	1953	1953	23971	23971000
MHCflurry1.2.0	overall	380010	23971	14227	2950	23971	23971000
MHCflurryMS	overall	353136	23971	13653	2772	23971	23971000
NetMHC4.0	overall	376573	23971	12624	2282	23971	23971000
NetMHCpan4.0	overall	355993	23971	13714	2483	23971	23971000

## Sheet: Table S5b
Table S5b. Per-allele and per-predictor performance statistics of each method on the BST benchmark datset
NOTE: Italic numbers are numbers reported in figures. MHC overall refers to weighted and ranked average of particular metric across all alleles
Predictor	mhc	PPVn	AUC	F1	KTAU	Pearson r
MHCnuggets	overall	0.417665	0.81584	0.136349	0.0282356	0.258836
MHCflurry1.2.0	overall	0.123065	0.863337	0.070434	0.0324816	0.133227
MHCflurryMS	overall	0.11564	0.855451	0.0724092	0.0317766	0.132036
NetMHC4.0	overall	0.0951984	0.867822	0.0630343	0.0328827	0.121291
NetMHCpan4.0	overall	0.103583	0.875987	0.0721858	0.0336341	0.133077
MHCnuggets	A*31:01	0.17284	0.788382	0.0132325	0.0257809	0.157601
MHCnuggets	B*51:01	1	0.840002	0.00933333	0.0303956	0.275079
MHCnuggets	A*24:02	0.349238	0.928049	0.17552	0.038267	0.319627
MHCnuggets	A*01:01	0.459201	0.761255	0.390591	0.023356	0.417903
MHCnuggets	A*03:01	0.40625	0.849364	0.0173623	0.0312327	0.233775
MHCnuggets	A*02:01	0.363636	0.837278	0.00260205	0.0301523	0.222808
NetMHCpan4.0	A*31:01	0.0737101	0.721028	0.0320272	0.019768	0.0772776
NetMHCpan4.0	B*51:01	0.221701	0.87326	0.23543	0.0334108	0.172048
NetMHCpan4.0	A*24:02	0.184609	0.922988	0.140664	0.0378526	0.178425
NetMHCpan4.0	A*01:01	0.382264	0.888763	0.277898	0.0347825	0.242651
NetMHCpan4.0	A*03:01	0.113101	0.888931	0.0786556	0.0347903	0.138638
NetMHCpan4.0	A*02:01	0.0989065	0.867412	0.0452798	0.0328632	0.115243
MHCflurry1.2.0	A*31:01	0.0525799	0.693901	0.0271321	0.0173344	0.0728032
MHCflurry1.2.0	B*51:01	0.251762	0.846421	0.201126	0.0309693	0.163178
MHCflurry1.2.0	A*24:02	0.161032	0.91854	0.0968998	0.0374167	0.148215
MHCflurry1.2.0	A*01:01	0.411572	0.895895	0.234066	0.0353922	0.267497
MHCflurry1.2.0	A*03:01	0.127943	0.865131	0.0727474	0.032642	0.137888
MHCflurry1.2.0	A*02:01	0.0745879	0.865876	0.0530299	0.0327086	0.120556
NetMHC4.0	A*31:01	0.0663391	0.729279	0.0294262	0.0204972	0.0748588
NetMHC4.0	B*51:01	0.19223	0.860041	0.193925	0.0321872	0.149098
NetMHC4.0	A*24:02	0.154359	0.909495	0.11714	0.0366084	0.15161
NetMHC4.0	A*01:01	0.308994	0.882853	0.197803	0.0342265	0.226025
NetMHC4.0	A*03:01	0.0887069	0.891089	0.0686026	0.0349628	0.12619
NetMHC4.0	A*02:01	0.0763832	0.852391	0.0397151	0.0315032	0.103013
MHCflurryMS	A*31:01	0.0732187	0.70421	0.030265	0.018256	0.0732063
MHCflurryMS	B*51:01	0.190891	0.837205	0.20325	0.0301455	0.157697
MHCflurryMS	A*24:02	0.158141	0.914735	0.133447	0.0370765	0.157568
MHCflurryMS	A*01:01	0.40096	0.888554	0.22557	0.034736	0.263245
MHCflurryMS	A*03:01	0.124019	0.863464	0.0740593	0.032493	0.129645
MHCflurryMS	A*02:01	0.0763832	0.866977	0.0489277	0.032807	0.11938

## Sheet: Table S5c
Table S5c. Counts of predicted and true positives for each predictor on each allele in BST benchmark dataset, broken down by peptide length.
NOTE: MHC overall refers to weighted and ranked average of particular metric across all alleles
Predictor	mhc	#PP	#PP_in_top_n	#TP	#TP_in_top_n	#total_binders_tested	#total_peps_tested	pep_length
MHCnuggets	HLA-A*01:01	23	23	9	9	223	223000	8.0mers
MHCflurry1.2.0	HLA-A*01:01	760	223	62	39	223	223000	8.0mers
MHCflurryMS	HLA-A*01:01	788	223	62	37	223	223000	8.0mers
NetMHC4.0	HLA-A*01:01	209	209	40	40	223	223000	8.0mers
NetMHCpan4.0	HLA-A*01:01	95	95	34	34	223	223000	8.0mers
MHCnuggets	HLA-A*02:01	0	0	0	0	165	165000	8.0mers
MHCflurry1.2.0	HLA-A*02:01	2219	165	60	10	165	165000	8.0mers
MHCflurryMS	HLA-A*02:01	2564	165	62	8	165	165000	8.0mers
NetMHC4.0	HLA-A*02:01	1035	165	37	7	165	165000	8.0mers
NetMHCpan4.0	HLA-A*02:01	591	165	36	11	165	165000	8.0mers
MHCnuggets	HLA-A*03:01	0	0	0	0	155	155000	8.0mers
MHCflurry1.2.0	HLA-A*03:01	1713	155	6	4	155	155000	8.0mers
MHCflurryMS	HLA-A*03:01	889	155	5	4	155	155000	8.0mers
NetMHC4.0	HLA-A*03:01	181	155	4	4	155	155000	8.0mers
NetMHCpan4.0	HLA-A*03:01	164	155	4	4	155	155000	8.0mers
MHCnuggets	HLA-A*24:02	0	0	0	0	126	126000	8.0mers
MHCflurry1.2.0	HLA-A*24:02	1193	126	37	15	126	126000	8.0mers
MHCflurryMS	HLA-A*24:02	799	126	35	15	126	126000	8.0mers
NetMHC4.0	HLA-A*24:02	158	126	16	12	126	126000	8.0mers
NetMHCpan4.0	HLA-A*24:02	147	126	17	15	126	126000	8.0mers
MHCnuggets	HLA-A*31:01	0	0	0	0	70	70000	8.0mers
MHCflurry1.2.0	HLA-A*31:01	1871	70	8	2	70	70000	8.0mers
MHCflurryMS	HLA-A*31:01	762	70	6	2	70	70000	8.0mers
NetMHC4.0	HLA-A*31:01	762	70	5	2	70	70000	8.0mers
NetMHCpan4.0	HLA-A*31:01	466	70	4	2	70	70000	8.0mers
MHCnuggets	HLA-B*51:01	1	1	1	1	232	232000	8.0mers
MHCflurry1.2.0	HLA-B*51:01	179	179	41	41	232	232000	8.0mers
MHCflurryMS	HLA-B*51:01	298	232	54	43	232	232000	8.0mers
NetMHC4.0	HLA-B*51:01	186	186	44	44	232	232000	8.0mers
NetMHCpan4.0	HLA-B*51:01	199	199	53	53	232	232000	8.0mers
MHCnuggets	HLA-A*01:01	1374	1374	531	531	1761	1761000	9.0mers
MHCflurry1.2.0	HLA-A*01:01	7764	1761	1019	704	1761	1761000	9.0mers
MHCflurryMS	HLA-A*01:01	8387	1761	1021	695	1761	1761000	9.0mers
NetMHC4.0	HLA-A*01:01	7046	1761	1001	674	1761	1761000	9.0mers
NetMHCpan4.0	HLA-A*01:01	5921	1761	980	709	1761	1761000	9.0mers
MHCnuggets	HLA-A*02:01	15	15	4	4	3081	3081000	9.0mers
MHCflurry1.2.0	HLA-A*02:01	85086	3081	2062	204	3081	3081000	9.0mers
MHCflurryMS	HLA-A*02:01	92902	3081	2088	197	3081	3081000	9.0mers
NetMHC4.0	HLA-A*02:01	95800	3081	2151	242	3081	3081000	9.0mers
NetMHCpan4.0	HLA-A*02:01	97083	3081	2179	318	3081	3081000	9.0mers
MHCnuggets	HLA-A*03:01	83	83	31	31	3352	3352000	9.0mers
MHCflurry1.2.0	HLA-A*03:01	55403	3352	2046	365	3352	3352000	9.0mers
MHCflurryMS	HLA-A*03:01	55481	3352	2059	377	3352	3352000	9.0mers
NetMHC4.0	HLA-A*03:01	49459	3352	1954	301	3352	3352000	9.0mers
NetMHCpan4.0	HLA-A*03:01	49600	3352	2053	391	3352	3352000	9.0mers
MHCnuggets	HLA-A*24:02	1320	1320	431	431	2142	2142000	9.0mers
MHCflurry1.2.0	HLA-A*24:02	32087	2142	1555	349	2142	2142000	9.0mers
MHCflurryMS	HLA-A*24:02	18818	2142	1333	349	2142	2142000	9.0mers
NetMHC4.0	HLA-A*24:02	17979	2142	1335	361	2142	2142000	9.0mers
NetMHCpan4.0	HLA-A*24:02	18953	2142	1446	398	2142	2142000	9.0mers
MHCnuggets	HLA-A*31:01	51	51	10	10	1445	1445000	9.0mers
MHCflurry1.2.0	HLA-A*31:01	55434	1445	631	76	1445	1445000	9.0mers
MHCflurryMS	HLA-A*31:01	48599	1445	633	100	1445	1445000	9.0mers
NetMHC4.0	HLA-A*31:01	45629	1445	628	111	1445	1445000	9.0mers
NetMHCpan4.0	HLA-A*31:01	44544	1445	633	108	1445	1445000	9.0mers
MHCnuggets	HLA-B*51:01	1	1	1	1	813	813000	9.0mers
MHCflurry1.2.0	HLA-B*51:01	731	731	186	186	813	813000	9.0mers
MHCflurryMS	HLA-B*51:01	1695	813	285	170	813	813000	9.0mers
NetMHC4.0	HLA-B*51:01	1584	813	260	182	813	813000	9.0mers
NetMHCpan4.0	HLA-B*51:01	1667	813	329	208	813	813000	9.0mers
MHCnuggets	HLA-A*01:01	697	697	341	341	786	786000	10.0mers
MHCflurry1.2.0	HLA-A*01:01	3594	786	572	376	786	786000	10.0mers
MHCflurryMS	HLA-A*01:01	3754	786	574	361	786	786000	10.0mers
NetMHC4.0	HLA-A*01:01	4057	786	538	255	786	786000	10.0mers
NetMHCpan4.0	HLA-A*01:01	3169	786	554	331	786	786000	10.0mers
MHCnuggets	HLA-A*02:01	1	1	1	1	966	966000	10.0mers
MHCflurry1.2.0	HLA-A*02:01	21119	966	654	101	966	966000	10.0mers
MHCflurryMS	HLA-A*02:01	23339	966	668	108	966	966000	10.0mers
NetMHC4.0	HLA-A*02:01	35282	966	652	68	966	966000	10.0mers
NetMHCpan4.0	HLA-A*02:01	33891	966	677	97	966	966000	10.0mers
MHCnuggets	HLA-A*03:01	20	20	9	9	1157	1157000	10.0mers
MHCflurry1.2.0	HLA-A*03:01	27482	1157	986	152	1157	1157000	10.0mers
MHCflurryMS	HLA-A*03:01	27875	1157	972	151	1157	1157000	10.0mers
NetMHC4.0	HLA-A*03:01	31490	1157	956	93	1157	1157000	10.0mers
NetMHCpan4.0	HLA-A*03:01	28178	1157	967	123	1157	1157000	10.0mers
MHCnuggets	HLA-A*24:02	116	116	61	61	870	870000	10.0mers
MHCflurry1.2.0	HLA-A*24:02	11014	870	580	155	870	870000	10.0mers
MHCflurryMS	HLA-A*24:02	6019	870	486	148	870	870000	10.0mers
NetMHC4.0	HLA-A*24:02	8495	870	507	130	870	870000	10.0mers
NetMHCpan4.0	HLA-A*24:02	7692	870	548	170	870	870000	10.0mers
MHCnuggets	HLA-A*31:01	9	9	1	1	192	192000	10.0mers
MHCflurry1.2.0	HLA-A*31:01	6298	192	119	13	192	192000	10.0mers
MHCflurryMS	HLA-A*31:01	5620	192	118	18	192	192000	10.0mers
NetMHC4.0	HLA-A*31:01	6439	192	118	11	192	192000	10.0mers
NetMHCpan4.0	HLA-A*31:01	6729	192	121	13	192	192000	10.0mers
MHCnuggets	HLA-B*51:01	5	5	5	5	150	150000	10.0mers
MHCflurry1.2.0	HLA-B*51:01	56	56	17	17	150	150000	10.0mers
MHCflurryMS	HLA-B*51:01	118	118	25	25	150	150000	10.0mers
NetMHC4.0	HLA-B*51:01	137	137	27	27	150	150000	10.0mers
NetMHCpan4.0	HLA-B*51:01	92	92	22	22	150	150000	10.0mers
MHCnuggets	HLA-A*01:01	427	427	212	212	533	533000	11.0mers
MHCflurry1.2.0	HLA-A*01:01	2088	533	318	216	533	533000	11.0mers
MHCflurryMS	HLA-A*01:01	2147	533	319	211	533	533000	11.0mers
NetMHC4.0	HLA-A*01:01	2104	533	277	124	533	533000	11.0mers
NetMHCpan4.0	HLA-A*01:01	1367	533	282	194	533	533000	11.0mers
MHCnuggets	HLA-A*02:01	6	6	3	3	952	952000	11.0mers
MHCflurry1.2.0	HLA-A*02:01	14363	952	453	61	952	952000	11.0mers
MHCflurryMS	HLA-A*02:01	16096	952	473	57	952	952000	11.0mers
NetMHC4.0	HLA-A*02:01	14475	952	271	34	952	952000	11.0mers
NetMHCpan4.0	HLA-A*02:01	18101	952	454	63	952	952000	11.0mers
MHCnuggets	HLA-A*03:01	24	24	12	12	859	859000	11.0mers
MHCflurry1.2.0	HLA-A*03:01	14141	859	682	150	859	859000	11.0mers
MHCflurryMS	HLA-A*03:01	9780	859	605	163	859	859000	11.0mers
NetMHC4.0	HLA-A*03:01	7283	859	362	78	859	859000	11.0mers
NetMHCpan4.0	HLA-A*03:01	7546	859	511	127	859	859000	11.0mers
MHCnuggets	HLA-A*24:02	69	69	32	32	735	735000	11.0mers
MHCflurry1.2.0	HLA-A*24:02	6733	735	393	110	735	735000	11.0mers
MHCflurryMS	HLA-A*24:02	3697	735	304	107	735	735000	11.0mers
NetMHC4.0	HLA-A*24:02	2703	735	171	73	735	735000	11.0mers
NetMHCpan4.0	HLA-A*24:02	2830	735	270	133	735	735000	11.0mers
MHCnuggets	HLA-A*31:01	18	18	2	2	279	279000	11.0mers
MHCflurry1.2.0	HLA-A*31:01	5377	279	197	24	279	279000	11.0mers
MHCflurryMS	HLA-A*31:01	1904	279	130	33	279	279000	11.0mers
NetMHC4.0	HLA-A*31:01	4967	279	134	8	279	279000	11.0mers
NetMHCpan4.0	HLA-A*31:01	4868	279	173	27	279	279000	11.0mers
MHCnuggets	HLA-B*51:01	0	0	0	0	111	111000	11.0mers
MHCflurry1.2.0	HLA-B*51:01	21	21	6	6	111	111000	11.0mers
MHCflurryMS	HLA-B*51:01	26	26	5	5	111	111000	11.0mers
NetMHC4.0	HLA-B*51:01	6	6	1	1	111	111000	11.0mers
NetMHCpan4.0	HLA-B*51:01	8	8	3	3	111	111000	11.0mers
MHCnuggets	HLA-A*01:01	251	251	144	144	327	327000	12.0mers
MHCflurry1.2.0	HLA-A*01:01	1353	327	238	144	327	327000	12.0mers
MHCflurryMS	HLA-A*01:01	1333	327	237	143	327	327000	12.0mers
NetMHC4.0	HLA-A*01:01	2074	327	196	66	327	327000	12.0mers
NetMHCpan4.0	HLA-A*01:01	886	327	218	129	327	327000	12.0mers
MHCnuggets	HLA-A*02:01	0	0	0	0	407	407000	12.0mers
MHCflurry1.2.0	HLA-A*02:01	5765	407	224	45	407	407000	12.0mers
MHCflurryMS	HLA-A*02:01	6645	407	228	42	407	407000	12.0mers
NetMHC4.0	HLA-A*02:01	7918	407	164	20	407	407000	12.0mers
NetMHCpan4.0	HLA-A*02:01	6885	407	239	53	407	407000	12.0mers
MHCnuggets	HLA-A*03:01	1	1	0	0	215	215000	12.0mers
MHCflurry1.2.0	HLA-A*03:01	2393	215	151	34	215	215000	12.0mers
MHCflurryMS	HLA-A*03:01	406	215	67	32	215	215000	12.0mers
NetMHC4.0	HLA-A*03:01	2893	215	97	16	215	215000	12.0mers
NetMHCpan4.0	HLA-A*03:01	1647	215	112	41	215	215000	12.0mers
MHCnuggets	HLA-A*24:02	4	4	3	3	282	282000	12.0mers
MHCflurry1.2.0	HLA-A*24:02	2222	282	165	58	282	282000	12.0mers
MHCflurryMS	HLA-A*24:02	1233	282	129	60	282	282000	12.0mers
NetMHC4.0	HLA-A*24:02	1555	282	87	33	282	282000	12.0mers
NetMHCpan4.0	HLA-A*24:02	960	282	119	64	282	282000	12.0mers
MHCnuggets	HLA-A*31:01	3	3	1	1	33	33000	12.0mers
MHCflurry1.2.0	HLA-A*31:01	534	33	14	2	33	33000	12.0mers
MHCflurryMS	HLA-A*31:01	17	17	5	5	33	33000	12.0mers
NetMHC4.0	HLA-A*31:01	849	33	12	0	33	33000	12.0mers
NetMHCpan4.0	HLA-A*31:01	525	33	15	4	33	33000	12.0mers
MHCnuggets	HLA-B*51:01	0	0	0	0	65	65000	12.0mers
MHCflurry1.2.0	HLA-B*51:01	3	3	0	0	65	65000	12.0mers
MHCflurryMS	HLA-B*51:01	1	1	0	0	65	65000	12.0mers
NetMHC4.0	HLA-B*51:01	6	6	0	0	65	65000	12.0mers
NetMHCpan4.0	HLA-B*51:01	3	3	1	1	65	65000	12.0mers
MHCnuggets	HLA-A*01:01	120	120	80	80	198	198000	13.0mers
MHCflurry1.2.0	HLA-A*01:01	803	198	147	83	198	198000	13.0mers
MHCflurryMS	HLA-A*01:01	772	198	143	83	198	198000	13.0mers
NetMHC4.0	HLA-A*01:01	1725	198	125	32	198	198000	13.0mers
NetMHCpan4.0	HLA-A*01:01	503	198	121	78	198	198000	13.0mers
MHCnuggets	HLA-A*02:01	0	0	0	0	298	298000	13.0mers
MHCflurry1.2.0	HLA-A*02:01	3545	298	162	35	298	298000	13.0mers
MHCflurryMS	HLA-A*02:01	4692	298	171	27	298	298000	13.0mers
NetMHC4.0	HLA-A*02:01	6971	298	105	14	298	298000	13.0mers
NetMHCpan4.0	HLA-A*02:01	4524	298	151	28	298	298000	13.0mers
MHCnuggets	HLA-A*03:01	0	0	0	0	88	88000	13.0mers
MHCflurry1.2.0	HLA-A*03:01	919	88	51	13	88	88000	13.0mers
MHCflurryMS	HLA-A*03:01	25	25	7	7	88	88000	13.0mers
NetMHC4.0	HLA-A*03:01	1700	88	38	4	88	88000	13.0mers
NetMHCpan4.0	HLA-A*03:01	654	88	34	14	88	88000	13.0mers
MHCnuggets	HLA-A*24:02	0	0	0	0	198	198000	13.0mers
MHCflurry1.2.0	HLA-A*24:02	1537	198	113	38	198	198000	13.0mers
MHCflurryMS	HLA-A*24:02	879	198	90	36	198	198000	13.0mers
NetMHC4.0	HLA-A*24:02	1440	198	69	19	198	198000	13.0mers
NetMHCpan4.0	HLA-A*24:02	618	198	84	48	198	198000	13.0mers
MHCnuggets	HLA-A*31:01	0	0	0	0	13	13000	13.0mers
MHCflurry1.2.0	HLA-A*31:01	207	13	4	0	13	13000	13.0mers
MHCflurryMS	HLA-A*31:01	9	9	0	0	13	13000	13.0mers
NetMHC4.0	HLA-A*31:01	429	13	3	0	13	13000	13.0mers
NetMHCpan4.0	HLA-A*31:01	179	13	4	0	13	13000	13.0mers
MHCnuggets	HLA-B*51:01	0	0	0	0	62	62000	13.0mers
MHCflurry1.2.0	HLA-B*51:01	3	3	0	0	62	62000	13.0mers
MHCflurryMS	HLA-B*51:01	0	0	0	0	62	62000	13.0mers
NetMHC4.0	HLA-B*51:01	4	4	0	0	62	62000	13.0mers
NetMHCpan4.0	HLA-B*51:01	1	1	0	0	62	62000	13.0mers
MHCnuggets	HLA-A*01:01	28	28	20	20	90	90000	14.0mers
MHCflurry1.2.0	HLA-A*01:01	313	90	53	34	90	90000	14.0mers
MHCflurryMS	HLA-A*01:01	287	90	53	33	90	90000	14.0mers
NetMHC4.0	HLA-A*01:01	1014	90	49	12	90	90000	14.0mers
NetMHCpan4.0	HLA-A*01:01	230	90	45	26	90	90000	14.0mers
MHCnuggets	HLA-A*02:01	0	0	0	0	155	155000	14.0mers
MHCflurry1.2.0	HLA-A*02:01	1500	155	71	20	155	155000	14.0mers
MHCflurryMS	HLA-A*02:01	2343	155	82	17	155	155000	14.0mers
NetMHC4.0	HLA-A*02:01	4243	155	58	8	155	155000	14.0mers
NetMHCpan4.0	HLA-A*02:01	2229	155	83	20	155	155000	14.0mers
MHCnuggets	HLA-A*03:01	0	0	0	0	30	30000	14.0mers
MHCflurry1.2.0	HLA-A*03:01	241	30	12	2	30	30000	14.0mers
MHCflurryMS	HLA-A*03:01	2	2	0	0	30	30000	14.0mers
NetMHC4.0	HLA-A*03:01	715	30	11	0	30	30000	14.0mers
NetMHCpan4.0	HLA-A*03:01	211	30	11	2	30	30000	14.0mers
MHCnuggets	HLA-A*24:02	0	0	0	0	87	87000	14.0mers
MHCflurry1.2.0	HLA-A*24:02	384	87	33	18	87	87000	14.0mers
MHCflurryMS	HLA-A*24:02	215	87	24	17	87	87000	14.0mers
NetMHC4.0	HLA-A*24:02	804	87	31	10	87	87000	14.0mers
NetMHCpan4.0	HLA-A*24:02	256	87	32	20	87	87000	14.0mers
MHCnuggets	HLA-A*31:01	0	0	0	0	3	3000	14.0mers
MHCflurry1.2.0	HLA-A*31:01	41	3	1	0	3	3000	14.0mers
MHCflurryMS	HLA-A*31:01	0	0	0	0	3	3000	14.0mers
NetMHC4.0	HLA-A*31:01	128	3	1	0	3	3000	14.0mers
NetMHCpan4.0	HLA-A*31:01	41	3	1	0	3	3000	14.0mers
MHCnuggets	HLA-B*51:01	0	0	0	0	32	32000	14.0mers
MHCflurry1.2.0	HLA-B*51:01	0	0	0	0	32	32000	14.0mers
MHCflurryMS	HLA-B*51:01	0	0	0	0	32	32000	14.0mers
NetMHC4.0	HLA-B*51:01	2	2	0	0	32	32000	14.0mers
NetMHCpan4.0	HLA-B*51:01	0	0	0	0	32	32000	14.0mers
MHCnuggets	HLA-A*01:01	9	9	8	8	40	40000	15.0mers
MHCflurry1.2.0	HLA-A*01:01	156	40	24	12	40	40000	15.0mers
MHCflurryMS	HLA-A*01:01	146	40	24	12	40	40000	15.0mers
NetMHC4.0	HLA-A*01:01	573	40	25	5	40	40000	15.0mers
NetMHCpan4.0	HLA-A*01:01	100	40	21	14	40	40000	15.0mers
MHCnuggets	HLA-A*02:01	0	0	0	0	103	103000	15.0mers
MHCflurry1.2.0	HLA-A*02:01	1140	103	49	10	103	103000	15.0mers
MHCflurryMS	HLA-A*02:01	1686	103	54	9	103	103000	15.0mers
NetMHC4.0	HLA-A*02:01	3246	103	39	3	103	103000	15.0mers
NetMHCpan4.0	HLA-A*02:01	1462	103	50	12	103	103000	15.0mers
MHCnuggets	HLA-A*03:01	0	0	0	0	6	6000	15.0mers
MHCflurry1.2.0	HLA-A*03:01	56	6	2	0	6	6000	15.0mers
MHCflurryMS	HLA-A*03:01	5	5	0	0	6	6000	15.0mers
NetMHC4.0	HLA-A*03:01	180	6	0	0	6	6000	15.0mers
NetMHCpan4.0	HLA-A*03:01	41	6	1	0	6	6000	15.0mers
MHCnuggets	HLA-A*24:02	0	0	0	0	56	56000	15.0mers
MHCflurry1.2.0	HLA-A*24:02	169	56	23	14	56	56000	15.0mers
MHCflurryMS	HLA-A*24:02	83	56	17	15	56	56000	15.0mers
NetMHC4.0	HLA-A*24:02	632	56	25	8	56	56000	15.0mers
NetMHCpan4.0	HLA-A*24:02	134	56	22	15	56	56000	15.0mers
MHCnuggets	HLA-B*51:01	0	0	0	0	28	28000	15.0mers
MHCflurry1.2.0	HLA-B*51:01	0	0	0	0	28	28000	15.0mers
MHCflurryMS	HLA-B*51:01	0	0	0	0	28	28000	15.0mers
NetMHC4.0	HLA-B*51:01	6	6	0	0	28	28000	15.0mers
NetMHCpan4.0	HLA-B*51:01	3	3	0	0	28	28000	15.0mers

[truncated: 13 more sheets: Table S5d, Table S5e, Table S5f, Table S6a, Table S6b, Table S7, Table S8a, Table S8b, Table S9a, Table S9b, Table S9c, Table S9d, Table S9e]
